# Supplementary material for: Optimization of Astaxanthin Recovery in the Downstream Process of Haematococcus pluvialis
Source: MDPI journal article supplement (doi:10.3390/foods11091352), 2022-05-06
Supplement: s1 [file s1]

Supplementary Information for **Optimization of Astaxanthin Recovery in the Downstream Process of *Haematococcus pluvialis***  
Inga K. Koopmann <sup>1</sup>, Simone Möller <sup>1,2</sup>, Clemens Elle <sup>2</sup>, Stefan Hindersin <sup>2</sup>, Annemarie Kramer <sup>1,\*</sup> and Antje Labes <sup>1,\*</sup>

**Table S1:** Overview of process parameters and results of the conducted experiments for model regression and evaluation in spray-drying.

| Run    | Input             |            |           |         |               | Output                               |       |                     |                  |                    |     |
|--------|-------------------|------------|-----------|---------|---------------|--------------------------------------|-------|---------------------|------------------|--------------------|-----|
|        | Inlet temperature | Spray flow | Feed rate | Cooling | Biomass conc. | <i>H. pluvialis</i> biomass recovery |       | Astaxanthin content |                  | Outlet temperature |     |
|        |                   |            |           |         |               |                                      |       | per biomass         | recovery         |                    |     |
|        | (°C)              | (NL/h)     | (%)       | -       | (g/L)         | (g)                                  | (%)   | (% w/w)             | SD <sup>a)</sup> | (%)                | °C  |
| Before |                   |            |           |         | 99.4          |                                      |       | 1.32                | 0.03             | -                  |     |
| 1      | 140               | 500        | 5         | no      | 99.4          | 1.2                                  | 6.04  | 1.17                | 0.04             | 88.6               | 99  |
| 2      | 160               | 500        | 10        | no      | 99.4          | 0.56                                 | 2.82  | 1.08                | 0.07             | 81.8               | 98  |
| 3      | 160               | 600        | 15        | no      | 99.4          | 1.03                                 | 5.18  | 1.06                | 0.05             | 80.3               | 80  |
| 4      | 180               | 400        | 10        | no      | 99.4          | 4.6                                  | 23.01 | 1.14                | 0.07             | 86.4               | 112 |
| 4.2    | 180               | 400        | 10        | no      | 99.4          | 4.93                                 | 25.1  | -                   |                  |                    | 134 |
| 5      | 140               | 400        | 5         | no      | 99.4          | 3.78                                 | 19.54 | 1.21                | 0.003            | 91.7               | 95  |
| 6      | 160               | 400        | 5         | no      | 99.4          | 3.92                                 | 19.51 | 1.1                 | 0.04             | 83.3               | 124 |
| 7      | 120               | 500        | 5         | no      | 99.4          | 0.43                                 | 2.09  | 1.1                 | 0.03             | 83.3               | 85  |
| 8      | 180               | 600        | 10        | no      | 99.4          | 0.18                                 | 0.9   | 0.91                | 0.03             | 68.9               | 111 |
| 9      | 180               | 500        | 10        | no      | 99.4          | 2.31                                 | 12.02 | 1.15                | 0.15             | 87.1               | 122 |
| 10     | 180               | 400        | 5         | no      | 99.4          | 2.81                                 | 14.12 | 1.16                | 0.04             | 87.9               | 134 |
| 11     | 180               | 400        | 15        | no      | 99.4          | 3.68                                 | 18.5  | 1.22                | 0.09             | 92.4               | 115 |
| 12     | 160               | 400        | 10        | no      | 99.4          | 2.36                                 | 11.84 | 1.22                | 0.1              | 92.4               | 107 |
| 13     | 180               | 500        | 15        | no      | 99.4          | 1.82                                 | 9.83  | 1.15                | 0.08             | 87.1               | 114 |
| 14     | 180               | 400        | 10        | yes     | 99.4          | 4.74                                 | 23.41 | -                   |                  | -                  | 123 |
| 15     | 180               | 400        | 10        | yes     | 49.7          | 2.58                                 | 24.62 | -                   |                  | -                  | 121 |
| 16     | 180               | 400        | 10        | yes     | 198.7         | 6.13                                 | 15.2  | -                   |                  | -                  | 122 |

<sup>a)</sup>SD = Standard deviation

**Table S2:** Content and proportion of astaxanthin and its diastereomers after various processing steps. Colors indicate comparison of samples.

| Process Step                               | n <sup>a)</sup> | Total astaxanthin             |                  |                   |     |     | all- <i>E</i> -astaxanthin |      |     |                     |      | 9 <i>Z</i> -astaxanthin |                 |      |     |       | 13 <i>Z</i> -astaxanthin |     |                 |      |     | di- <i>Z</i> -astaxanthin |      |     |                 |      |     |       |      |     |  |
|--------------------------------------------|-----------------|-------------------------------|------------------|-------------------|-----|-----|----------------------------|------|-----|---------------------|------|-------------------------|-----------------|------|-----|-------|--------------------------|-----|-----------------|------|-----|---------------------------|------|-----|-----------------|------|-----|-------|------|-----|--|
|                                            |                 | Ax/ <i>H.p.</i> <sup>b)</sup> | SD <sup>c)</sup> | Sig <sup>d)</sup> | Sig | Sig | Ax/ <i>H.p.</i>            | SD   | Sig | Prop. <sup>e)</sup> | SD   | Sig                     | Ax/ <i>H.p.</i> | SD   | Sig | Prop. | SD                       | Sig | Ax/ <i>H.p.</i> | SD   | Sig | Prop.                     | Stab | Sig | Ax/ <i>H.p.</i> | SD   | Sig | Prop. | Stab | Sig |  |
| Analytical scale                           |                 |                               |                  |                   |     |     |                            |      |     |                     |      |                         |                 |      |     |       |                          |     |                 |      |     |                           |      |     |                 |      |     |       |      |     |  |
| Non-disrupted                              | 6               | 2.73                          | 0.15             | -                 | -   | a   | 2.31                       | 0.09 | -   | 84.88               | 2.05 | -                       | 0.12            | 0.03 | -   | 4.21  | 0.78                     | -   | 0.10            | 0.02 | -   | 3.61                      | 0.43 | -   | 0.20            | 0.04 | -   | 7.30  | 0.92 | -   |  |
| BM <sup>f)</sup> (1x)                      | 10              | 2.68                          | 0.15             | e                 | -   | -   | 2.20                       | 0.14 | e   | 82.09               | 1.92 | *                       | 0.13            | 0.02 | e   | 4.89  | 0.66                     | e   | 0.12            | 0.02 | *   | 4.49                      | 0.59 | *   | 0.23            | 0.03 | e   | 8.53  | 1.02 | *   |  |
| BM (2x)                                    | 9               | 2.62                          | 0.11             | e                 | -   | -   | 2.14                       | 0.11 | *   | 81.73               | 1.60 | *                       | 0.13            | 0.01 | e   | 4.95  | 0.62                     | e   | 0.12            | 0.01 | *   | 4.55                      | 0.39 | *   | 0.23            | 0.02 | e   | 8.78  | 0.85 | *   |  |
| BM (3x)                                    | 8               | 2.59                          | 0.11             | e                 | -   | a   | 2.13                       | 0.12 | *   | 82.23               | 1.46 | *                       | 0.13            | 0.01 | e   | 4.90  | 0.57                     | e   | 0.12            | 0.01 | *   | 4.49                      | 0.31 | *   | 0.22            | 0.02 | e   | 8.38  | 0.85 | *   |  |
| BM - SD <sup>g)</sup>                      | 9               | 2.68                          | 0.09             | e                 | a   | a   | 2.24                       | 0.08 | *   | 83.40               | 0.65 | *                       | 0.12            | 0.01 | *   | 4.38  | 0.19                     | e   | 0.10            | 0.00 | *   | 3.72                      | 0.18 | *   | 0.23            | 0.01 | e   | 8.50  | 0.31 | e   |  |
| BM - FD <sup>h)</sup>                      | 9               | 2.52                          | 0.05             | e                 | b   | a   | 2.11                       | 0.05 | e   | 83.74               | 0.74 | *                       | 0.11            | 0.01 | *   | 4.22  | 0.26                     | *   | 0.12            | 0.01 | e   | 4.63                      | 0.31 | e   | 0.19            | 0.01 | *   | 7.41  | 0.45 | *   |  |
| BM - VD <sup>i)</sup>                      | 9               | 2.25                          | 0.11             | *                 | c   | a   | 1.87                       | 0.09 | *   | 83.05               | 0.38 | e                       | 0.10            | 0.01 | *   | 4.29  | 0.21                     | *   | 0.09            | 0.00 | *   | 3.91                      | 0.17 | *   | 0.20            | 0.01 | *   | 8.75  | 0.29 | e   |  |
| BM - SD - SC-CO <sub>2</sub> <sup>j)</sup> | 3               | 8.33                          | 0.20             | *                 | -   | -   | 7.18                       | 0.18 | *   | 86.26               | 0.16 | *                       | 0.28            | 0.02 | *   | 3.36  | 0.27                     | *   | 0.28            | 0.01 | *   | 3.37                      | 0.08 | *   | 0.58            | 0.02 | *   | 7.01  | 0.09 | *   |  |
| BM - FD - SC-CO <sub>2</sub>               | 3               | 8.78                          | 0.11             | *                 | -   | -   | 7.58                       | 0.08 | *   | 86.30               | 0.18 | *                       | 0.29            | 0.02 | *   | 3.26  | 0.29                     | *   | 0.29            | 0.01 | *   | 3.31                      | 0.11 | *   | 0.63            | 0.04 | *   | 7.13  | 0.34 | e   |  |
| BM - VD - SC-CO <sub>2</sub>               | 3               | 6.90                          | 0.16             | *                 | -   | -   | 5.91                       | 0.14 | *   | 85.68               | 0.04 | *                       | 0.22            | 0.00 | *   | 3.23  | 0.07                     | *   | 0.22            | 0.01 | *   | 3.23                      | 0.09 | *   | 0.54            | 0.01 | *   | 7.86  | 0.10 | *   |  |
| Pilot scale                                |                 |                               |                  |                   |     |     |                            |      |     |                     |      |                         |                 |      |     |       |                          |     |                 |      |     |                           |      |     |                 |      |     |       |      |     |  |
| Non-disrupted                              | 6               | 2.73                          | 0.15             | -                 | -   | -   | 2.31                       | 0.09 | -   | 84.88               | 2.05 | -                       | 0.12            | 0.03 | -   | 4.21  | 0.78                     | -   | 0.10            | 0.02 | -   | 3.61                      | 0.43 | -   | 0.20            | 0.04 | -   | 7.30  | 0.92 | -   |  |
| HPH <sup>k)</sup> (1x)                     | 12              | 2.76                          | 0.06             | e                 | -   | -   | 2.34                       | 0.05 | e   | 84.77               | 1.04 | e                       | 0.12            | 0.01 | e   | 4.25  | 0.27                     | e   | 0.09            | 0.01 | e   | 3.41                      | 0.21 | e   | 0.21            | 0.02 | e   | 7.57  | 0.64 | e   |  |
| HPH (2x)                                   | 12              | 2.67                          | 0.14             | e                 | -   | a   | 2.26                       | 0.12 | e   | 84.64               | 1.10 | e                       | 0.11            | 0.01 | e   | 4.12  | 0.28                     | e   | 0.09            | 0.01 | e   | 3.50                      | 0.30 | e   | 0.21            | 0.02 | e   | 7.74  | 0.68 | e   |  |
| HPH - SD                                   | 9               | 2.45                          | 0.14             | *                 | b   | b   | 2.05                       | 0.12 | *   | 83.69               | 0.56 | *                       | 0.11            | 0.01 | e   | 4.57  | 0.33                     | *   | 0.09            | 0.00 | e   | 3.66                      | 0.20 | e   | 0.20            | 0.01 | e   | 8.08  | 0.27 | e   |  |
| HPH - FD                                   | 9               | 2.64                          | 0.19             | e                 | a   | a   | 2.21                       | 0.15 | e   | 83.85               | 1.16 | e                       | 0.11            | 0.02 | e   | 4.15  | 0.41                     | e   | 0.13            | 0.02 | *   | 4.76                      | 0.45 | *   | 0.19            | 0.02 | e   | 7.24  | 0.51 | e   |  |
| HPH - VD                                   | 9               | 2.27                          | 0.25             | *                 | b   | a   | 1.90                       | 0.20 | *   | 83.78               | 0.63 | e                       | 0.10            | 0.01 | *   | 4.26  | 0.20                     | e   | 0.09            | 0.01 | e   | 3.96                      | 0.23 | *   | 0.18            | 0.03 | *   | 8.00  | 0.46 | e   |  |
| HPH - SD - SC-CO <sub>2</sub>              | 4               | 10.15                         | 0.14             | *                 | -   | -   | 8.68                       | 0.17 | *   | 85.54               | 0.43 | *                       | 0.38            | 0.06 | *   | 3.73  | 0.62                     | e   | 0.35            | 0.01 | *   | 3.46                      | 0.15 | e   | 0.74            | 0.03 | *   | 7.27  | 0.24 | *   |  |
| HPH - FD - SC-CO <sub>2</sub>              | 3               | 8.83                          | 0.09             | *                 | -   | -   | 7.50                       | 0.10 | *   | 85.04               | 1.39 | e                       | 0.36            | 0.04 | *   | 4.12  | 0.44                     | e   | 0.30            | 0.03 | *   | 3.38                      | 0.31 | *   | 0.66            | 0.06 | *   | 7.46  | 0.65 | e   |  |
| HPH - VD - SC-CO <sub>2</sub>              | 3               | 7.17                          | 0.08             | *                 | -   | -   | 6.11                       | 0.07 | *   | 85.22               | 0.41 | *                       | 0.26            | 0.02 | *   | 3.56  | 0.33                     | *   | 0.24            | 0.01 | *   | 3.36                      | 0.08 | *   | 0.56            | 0.04 | *   | 7.85  | 0.45 | e   |  |
| Pilot scale                                |                 |                               |                  |                   |     |     |                            |      |     |                     |      |                         |                 |      |     |       |                          |     |                 |      |     |                           |      |     |                 |      |     |       |      |     |  |
| Non-disrupted                              | 6               | 2.73                          | 0.15             | -                 | -   | -   | 2.31                       | 0.09 | -   | 84.88               | 2.05 | -                       | 0.12            | 0.03 | -   | 4.21  | 0.78                     | -   | 0.10            | 0.02 | -   | 3.61                      | 0.43 | -   | 0.20            | 0.04 | -   | 7.30  | 0.92 | -   |  |
| ND <sup>l)</sup> - SD                      | 9               | 2.50                          | 0.12             | *                 | b   | b   | 2.09                       | 0.08 | *   | 83.67               | 3.65 | e                       | 0.12            | 0.03 | e   | 4.57  | 1.06                     | e   | 0.09            | 0.02 | e   | 3.72                      | 0.78 | e   | 0.20            | 0.05 | e   | 8.04  | 1.82 | e   |  |
| ND - FD                                    | 9               | 2.58                          | 0.18             | e                 | ab  | a   | 2.16                       | 0.13 | *   | 83.66               | 1.36 | e                       | 0.11            | 0.02 | e   | 4.22  | 0.49                     | e   | 0.12            | 0.02 | e   | 4.58                      | 0.50 | *   | 0.20            | 0.03 | e   | 7.55  | 0.53 | e   |  |
| ND - VD                                    | 9               | 2.70                          | 0.05             | e                 | a   | b   | 2.25                       | 0.05 | e   | 83.27               | 0.64 | *                       | 0.11            | 0.01 | e   | 4.25  | 0.19                     | e   | 0.11            | 0.01 | e   | 3.92                      | 0.25 | e   | 0.23            | 0.01 | *   | 8.56  | 0.39 | *   |  |
| ND - SD - SC-CO <sub>2</sub>               | 3               | 3.38                          | 0.07             | *                 | -   | -   | 2.96                       | 0.03 | *   | 87.59               | 1.13 | e                       | 0.10            | 0.01 | e   | 3.04  | 0.28                     | *   | 0.11            | 0.01 | e   | 3.26                      | 0.32 | e   | 0.21            | 0.02 | e   | 6.11  | 0.59 | e   |  |
| ND - FD - SC-CO <sub>2</sub>               | 3               | 6.73                          | 0.17             | *                 | -   | -   | 5.89                       | 0.13 | *   | 87.43               | 0.47 | *                       | 0.21            | 0.03 | *   | 3.15  | 0.32                     | *   | 0.21            | 0.02 | *   | 3.13                      | 0.26 | *   | 0.42            | 0.04 | *   | 6.28  | 0.59 | e   |  |
| ND - VD - SC-CO <sub>2</sub>               | 3               | 8.98                          | 0.18             | *                 | -   | -   | 7.83                       | 0.07 | *   | 87.18               | 0.90 | *                       | 0.28            | 0.04 | *   | 3.16  | 0.40                     | *   | 0.30            | 0.02 | *   | 3.30                      | 0.10 | *   | 0.57            | 0.05 | *   | 6.36  | 0.41 | *   |  |
| Pilot scale                                |                 |                               |                  |                   |     |     |                            |      |     |                     |      |                         |                 |      |     |       |                          |     |                 |      |     |                           |      |     |                 |      |     |       |      |     |  |
| Non-disrupted                              | 4               | 2.15                          | 0.07             | -                 | a   | -   | 1.92                       | 0.06 | -   | 89.02               | 0.11 | -                       | 0.06            | 0.00 | -   | 2.73  | 0.03                     | -   | 0.06            | 0.00 | -   | 3.00                      | 0.09 | -   | 0.11            | 0.00 | -   | 5.25  | 0.11 | -   |  |
| BM (1x)                                    | 3               | 2.01                          | 0.04             | *                 | a   | -   | 1.78                       | 0.04 | *   | 88.60               | 0.42 | e                       | 0.06            | 0.01 | e   | 2.87  | 0.23                     | e   | 0.06            | 0.00 | *   | 2.96                      | 0.18 | e   | 0.11            | 0.01 | e   | 5.57  | 0.35 | e   |  |
| BM (2x)                                    | 3               | 2.00                          | 0.08             | *                 | a   | -   | 1.78                       | 0.08 | *   | 88.86               | 0.77 | e                       | 0.06            | 0.01 | e   | 2.94  | 0.34                     | e   | 0.06            | 0.01 | e   | 2.96                      | 0.41 | e   | 0.10            | 0.01 | e   | 5.24  | 0.44 | e   |  |
| BM (3x)                                    | 3               | 1.88                          | 0.34             | e                 | a   | -   | 1.66                       | 0.32 | e   | 88.54               | 1.17 | e                       | 0.06            | 0.00 | e   | 3.41  | 0.75                     | e   | 0.05            | 0.01 | *   | 2.53                      | 0.08 | *   | 0.10            | 0.01 | e   | 5.52  | 0.54 | e   |  |
| BM - SD                                    | 3               | 1.85                          | 0.11             | e                 | b   | -   | 1.64                       | 0.09 | e   | 88.83               | 1.10 | e                       | 0.05            | 0.01 | e   | 2.77  | 0.24                     | e   | 0.05            | 0.01 | e   | 2.57                      | 0.36 | e   | 0.11            | 0.02 | e   | 5.84  | 0.58 | e   |  |

<sup>a)</sup> n=Number of measurements

<sup>b)</sup> Ax/*H.p.* = Proportion of astaxanthin in relation to total *H. pluvialis* biomass (% w/w)

<sup>c)</sup> SD = Standard deviation

<sup>d)</sup> Sig = Indicates significant differences ( $\sigma=0.05$ ) between the sample and its predececor. All milled and high-pressure homogenized samples are compared to the undisrupted samples. \* means significant difference and e indicates no significant difference. Samples highlighted in the same color were compared. Equal letter indicate no significant difference and unequal letters indicate significant differences.

<sup>e)</sup> Prop. = Proportion of astaxanthin isomers in relation to total astaxanthin (% w/w)

<sup>f)</sup> BM = Bead-milling

<sup>g)</sup> SD = Spray-drying

<sup>h)</sup> FD = Freeze-drying

<sup>i)</sup> VD = Vacuum-drying

<sup>j)</sup> SC-CO<sub>2</sub> = sSpercritical CO<sub>2</sub> extraction

<sup>k)</sup> HPH = High-pressure homogenization

<sup>l)</sup> ND = No disruption

**Table S3:** Estimated model coefficients, p-values and optimized parameters regarding maximal astaxanthin yield in spray-drying. Significant p-values ( $\sigma=0.05$ ) are highlighted bold.

|                                       | Linear model |               | Quadratic model |         | Quadratic model + interactions |         |
|---------------------------------------|--------------|---------------|-----------------|---------|--------------------------------|---------|
|                                       | coefficient  | p-value       | coefficient     | p-value | coefficient                    | p-value |
| a (Intercept)                         | 1.8038       |               | -0.1508         |         | 0.9095                         |         |
| b <sub>1</sub> (Spray <sup>a</sup> )  | -0.001       | <b>0.0011</b> | 0.0046          | 0.2196  | 0.004                          | 0.5303  |
| b <sub>2</sub> (Feed <sup>b</sup> )   | 0.0096       | 0.0848        | -0.0123         | 0.6699  | 0.0797                         | 0.749   |
| b <sub>3</sub> (Temp <sup>c</sup> )   | -0.0017      | 0.1054        | 0.0065          | 0.6521  | -0.0094                        | 0.8376  |
| b <sub>11</sub> (Spray <sup>2</sup> ) |              |               | 0               | 0.1453  | 0                              | 0.3004  |
| b <sub>22</sub> (Feed <sup>2</sup> )  |              |               | 0.0011          | 0.4536  | 0.0021                         | 0.5842  |
| b <sub>33</sub> (Temp <sup>2</sup> )  |              |               | 0               | 0.6002  | 0                              | 0.8778  |
| b <sub>12</sub> (Spray*Feed)          |              |               |                 |         | 0                              | 0.8265  |
| b <sub>13</sub> (Spray*Temp)          |              |               |                 |         | 0                              | 0.747   |
| b <sub>23</sub> (Feed*Temp)           |              |               |                 |         | -0.0005                        | 0.6942  |
| R <sup>2</sup>                        | 0.7151       |               | 0.8122          |         | 0.8244                         |         |
| R <sup>2</sup> adjusted               | 0.6201       |               | 0.6244          |         | 0.2975                         |         |
| <b>Optimized parameters</b>           |              |               |                 |         |                                |         |
| Feed                                  | 15           |               | 15              |         | 15                             |         |
| Spray                                 | 400          |               | 400             |         | 400                            |         |
| Temp                                  | 120          |               | 136.88          |         | 120                            |         |

<sup>a</sup>Spray = Spray gas flow (NL/h)

<sup>b</sup>Feed = Product feed rate (%)

<sup>c</sup>Temp = Inlet Temperature (°C)
